# Supplementary material for: Gut Microbiota Differentially Mediated by Qingmao Tea and Qingzhuan Tea Alleviated High-Fat-Induced Obesity and Associated Metabolic Disorders: The Impact of Microbial Fermentation
Source: MDPI journal article supplement (doi:10.3390/foods11203210), 2022-10-14
Supplement: s1 [file s1]

## Supplementary Materials

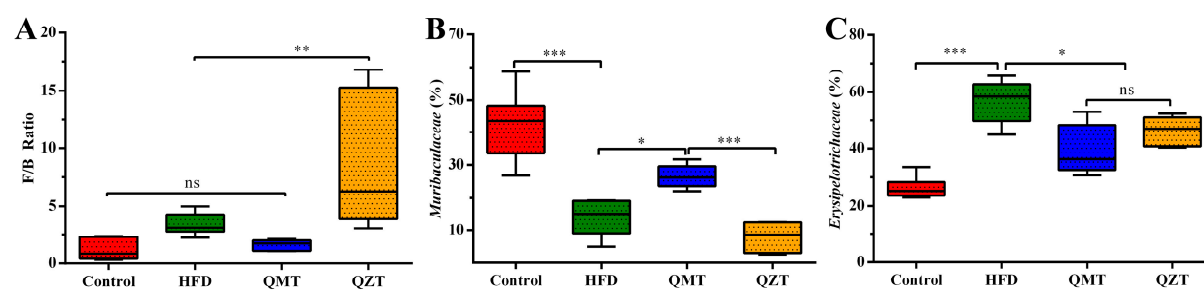

**Figure S1.** (A) The F/B ratio, and the relative abundance of *Muribaculaceae* (B) and *Eysipelotrichaceae* (C) among the control, HFD, QMT, and QZT groups.

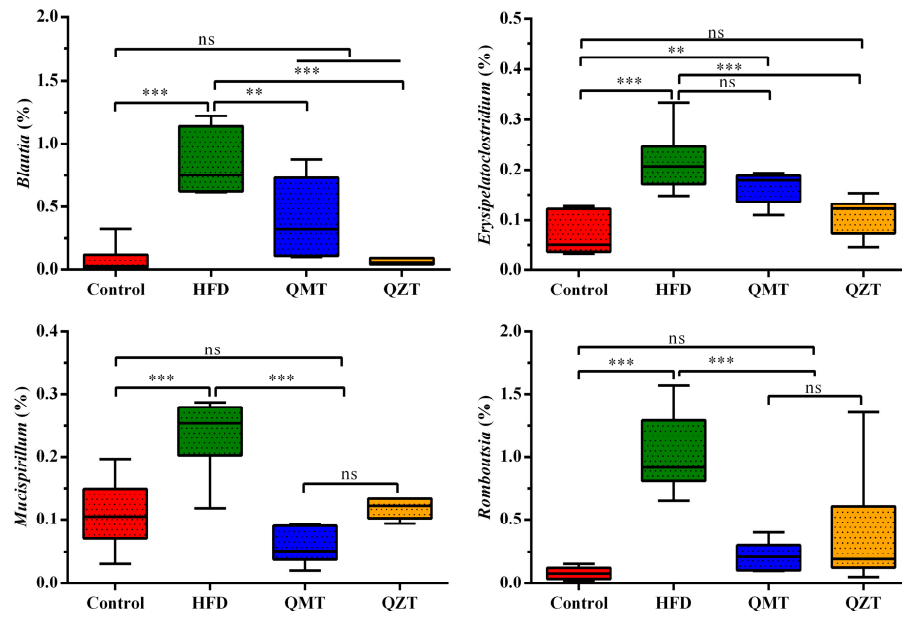

**Figure S2.** The gut microbiota restored by QMTe and QZTe treatment at the genus level.
